# Supplementary material for: Dysregulated anti-oxidant signalling and compromised mitochondrial integrity negatively influence regulatory T cell function and viability in liver disease
Source: PubMed Central journal article supplement (PMC10480539; doi:10.1016/j.ebiom.2023.104778), 2023-08-30
Supplement: mmc1.pdf [file mmc1.pdf]

# Supplementary Material

## Table of Contents

|                                                                             |    |
|-----------------------------------------------------------------------------|----|
| Supplementary Figure 1.....                                                 | 2  |
| Supplementary Figure 2.....                                                 | 3  |
| Supplementary Figure 3.....                                                 | 3  |
| Supplementary Table 1. Top differentially regulated genes in LC Tregs ..... | 4  |
| Supplementary Table 2. Transcriptional features of LC Tregs.....            | 5  |
| Supplementary Table 3. Per-figure summary of applied statistical tests..... | 7  |
| Supplementary Table 4. Summary of fluorochrome-conjugated antibodies.....   | 11 |

# Supplementary Figure 1.

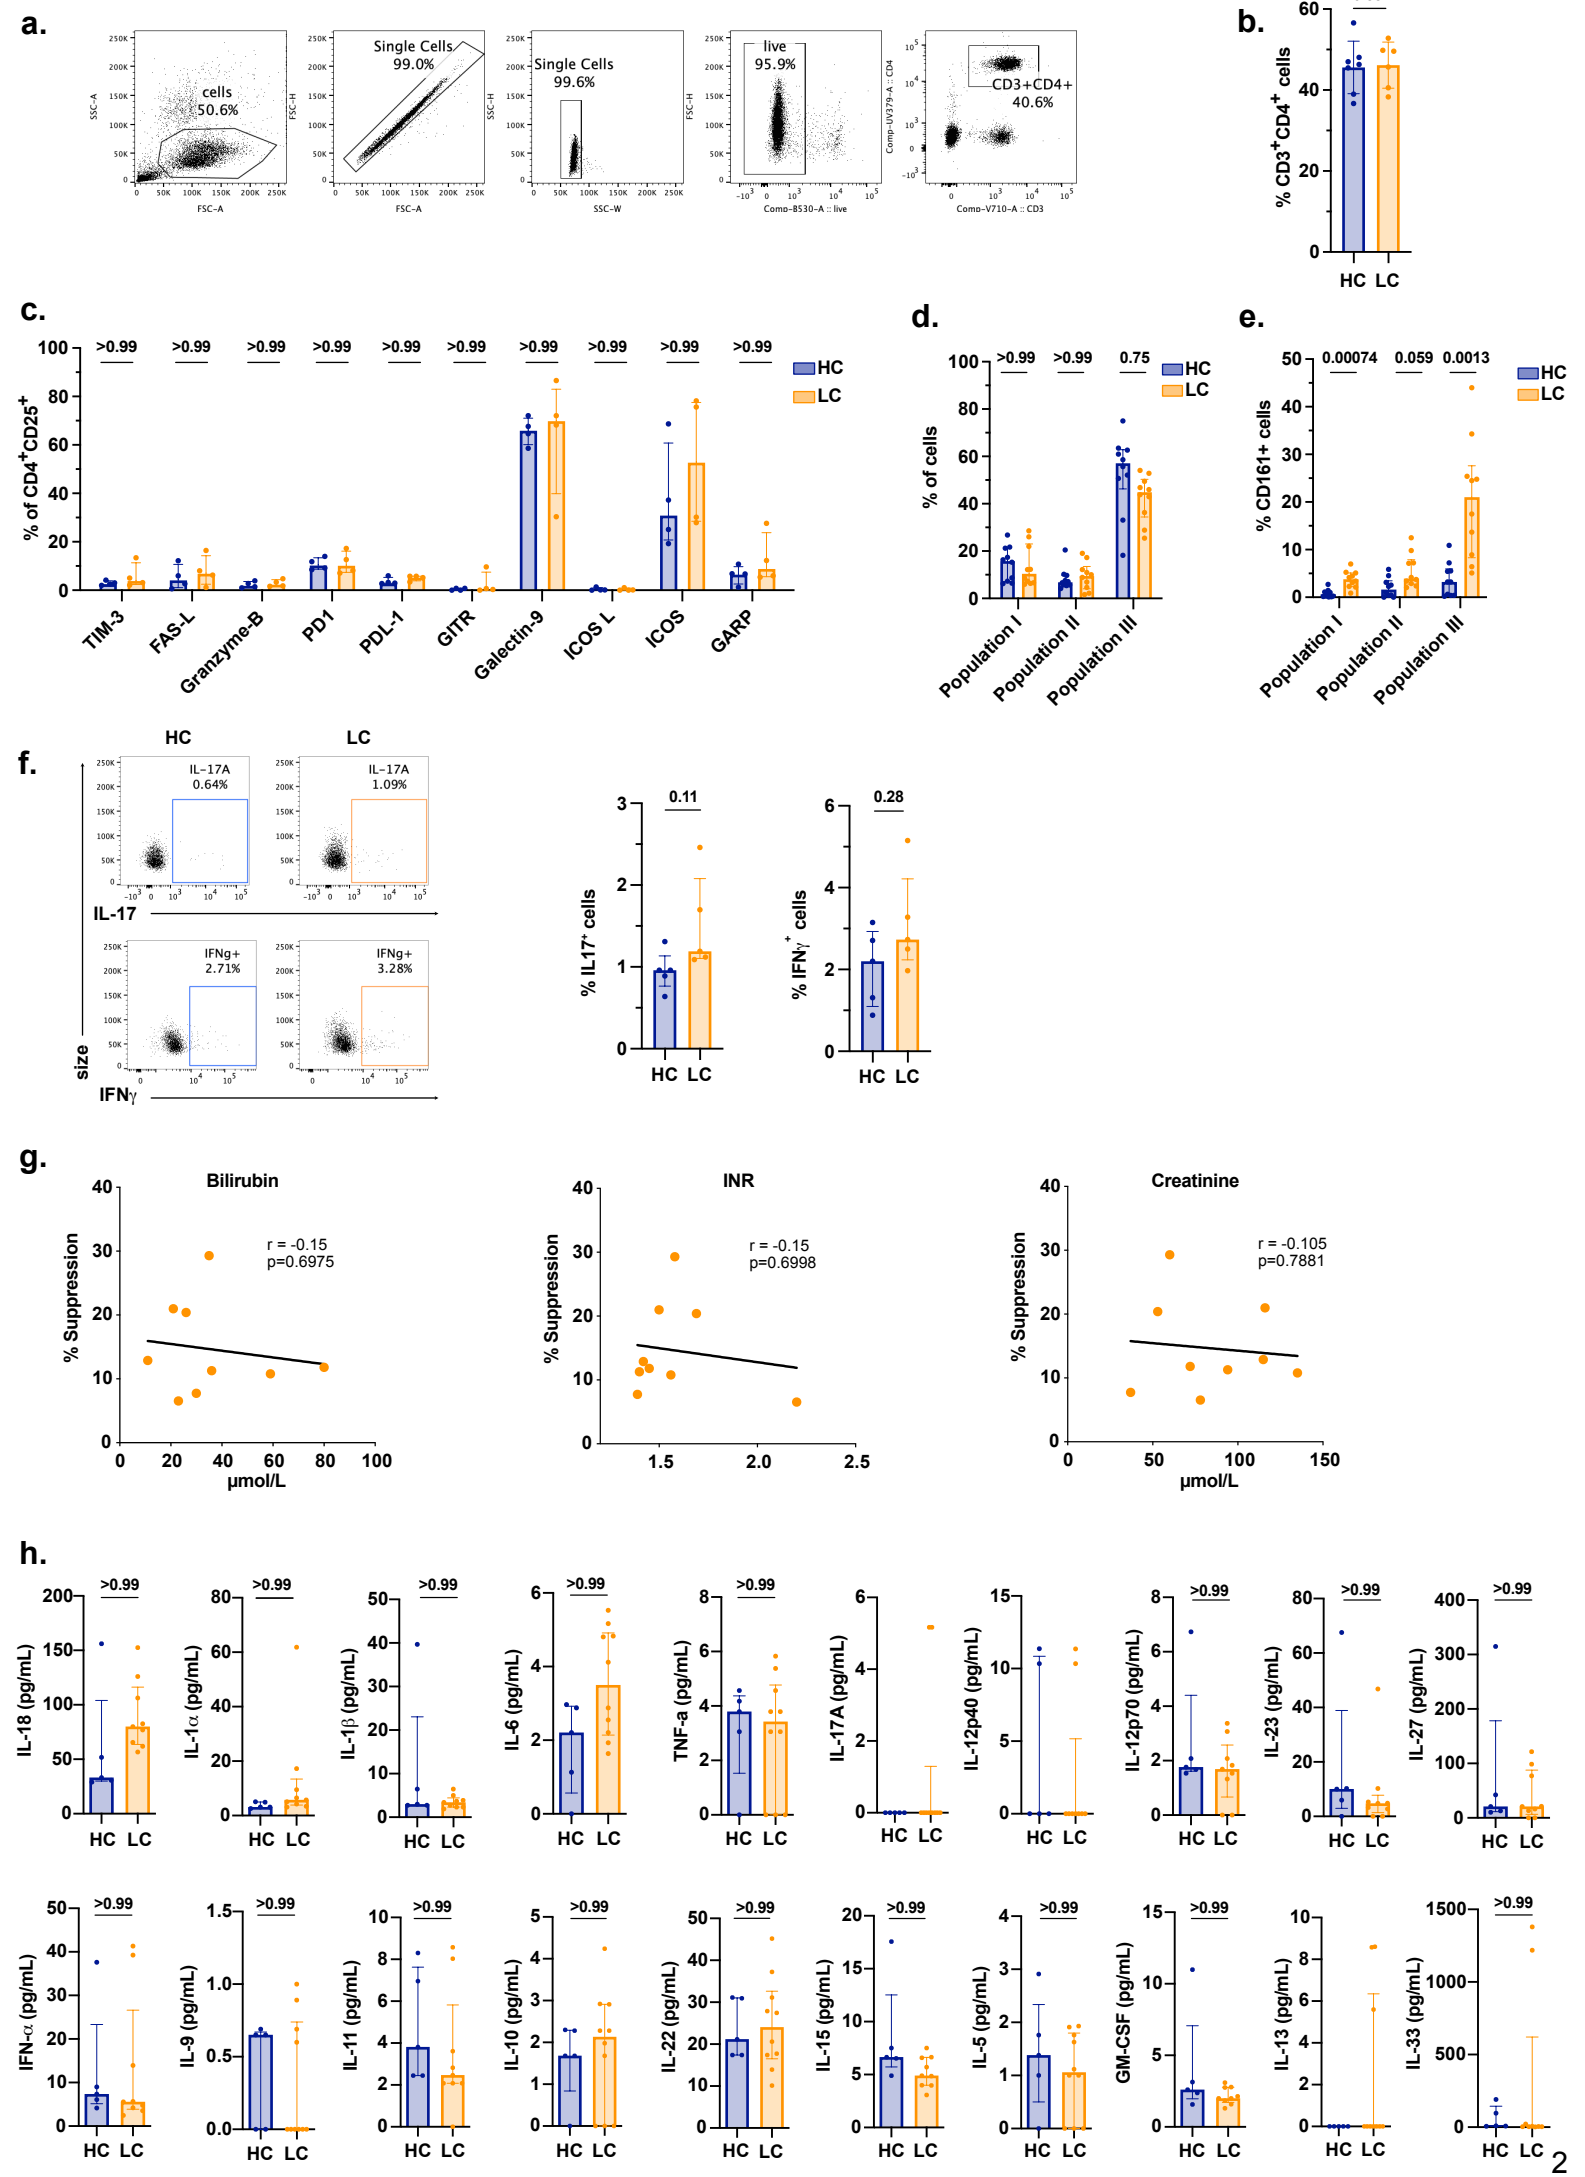

### Supplementary Figure 2.

a.

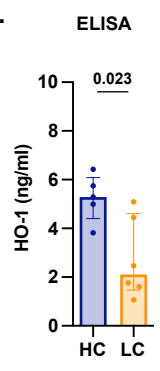

b.

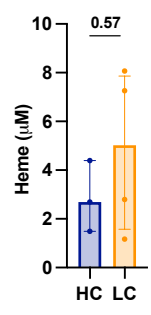

### Supplementary Figure 3.

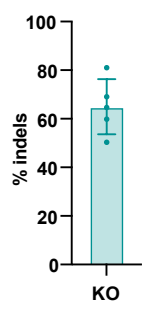

### Supplementary Table 1.

Top 15 differentially expressed genes ( $p < 0.01$ ) between Tregs of liver cirrhotic patients (LC) and healthy controls (HC).

|           | <b>Gene</b>     | <b>Ensembl ID</b> | <b>log2r</b> | <b>p-value</b> | <b>q-value</b> |
|-----------|-----------------|-------------------|--------------|----------------|----------------|
| <b>1</b>  | <i>EBF4</i>     | ENSG00000088881   | -1.321376    | 0.000001       | 0.005725       |
| <b>2</b>  | <i>GPR15</i>    | ENSG00000154165   | 2.100661     | 0.000001       | 0.005725       |
| <b>3</b>  | <i>HLA-H</i>    | ENSG00000206341   | 2.095677     | 0.000003       | 0.022216       |
| <b>4</b>  | <i>LRRC37A3</i> | ENSG00000176809   | 1.429746     | 0.000005       | 0.023532       |
| <b>5</b>  | <i>SV2A</i>     | ENSG00000159164   | 0.681124     | 0.000008       | 0.033876       |
| <b>6</b>  | <i>SPARC</i>    | ENSG00000113140   | -2.09316     | 0.000015       | 0.047453       |
| <b>7</b>  | <i>ARMC10</i>   | ENSG00000170632   | -0.87305     | 0.000017       | 0.047453       |
| <b>8</b>  | <i>CCND3</i>    | ENSG00000112576   | -0.680468    | 0.000019       | 0.047889       |
| <b>9</b>  | <i>PIK3C2B</i>  | ENSG00000133056   | 0.840302     | 0.000026       | 0.057316       |
| <b>10</b> | <i>MLLT3</i>    | ENSG00000171843   | -0.881823    | 0.000037       | 0.074275       |
| <b>11</b> | <i>BMF</i>      | ENSG00000104081   | 1.214842     | 0.000119       | 0.210555       |
| <b>12</b> | <i>CHCHD3</i>   | ENSG00000106554   | -0.510803    | 0.000126       | 0.210555       |
| <b>13</b> | <i>NRGN</i>     | ENSG00000154146   | -1.810251    | 0.000146       | 0.215613       |
| <b>14</b> | <i>MCUB</i>     | ENSG00000005059   | -0.581298    | 0.000151       | 0.215613       |
| <b>15</b> | <i>EDAR</i>     | ENSG00000135960   | -1.344782    | 0.000163       | 0.216792       |

**Supplementary Table 2.**

**Top 15 downregulated canonical pathways (C2) in LC patients.**

|    | ID                                                                                                             | setSize | enrichmentScore | NES    | pvalue  | p.adjust | rank |
|----|----------------------------------------------------------------------------------------------------------------|---------|-----------------|--------|---------|----------|------|
| 1  | KEGG_RIBOSOME                                                                                                  | 81      | -0.581          | -2.584 | 0.00004 | 0.0084   | 6231 |
| 2  | REACTOME_EUKARYOTIC_TRANSLATION_ELONGATION                                                                     | 87      | -0.571          | -2.575 | 0.00004 | 0.0084   | 6231 |
| 3  | REACTOME_EUKARYOTIC_TRANSLATION_INITIATION                                                                     | 111     | -0.471          | -2.215 | 0.00004 | 0.0084   | 5086 |
| 4  | KEGG_PENTOSE_PHOSPHATE_PATHWAY                                                                                 | 19      | -0.654          | -2.076 | 0.00036 | 0.0311   | 1851 |
| 5  | REACTOME_ACTIVATION_OF_THE_MRNA_UPON_BINDING_OF_THE_CAP_BINDING_COMPLEX_AND_EIFS_AND_SUBSEQUENT_BINDING_TO_43S | 55      | -0.495          | -2.043 | 0.00010 | 0.0124   | 5078 |
| 6  | REACTOME_RESPONSE_OF_EIF2AK4_GCN2_TO_AMINO_ACID_DEFICIENCY                                                     | 94      | -0.446          | -2.038 | 0.00004 | 0.0084   | 5086 |
| 7  | REACTOME_SELENOAMINO_ACID_METABOLISM                                                                           | 109     | -0.433          | -2.028 | 0.00004 | 0.0084   | 5086 |
| 8  | KEGG_PEROXISOME                                                                                                | 70      | -0.441          | -1.908 | 0.00017 | 0.0187   | 4483 |
| 9  | REACTOME_MISMATCH_REPAIR                                                                                       | 15      | -0.638          | -1.898 | 0.00318 | 0.0997   | 2272 |
| 10 | REACTOME_PURINE_CATABOLISM                                                                                     | 17      | -0.614          | -1.892 | 0.00310 | 0.0997   | 1738 |
| 11 | REACTOME_RESPONSE_TO_ELEVATED_PLATELET_CYTOSOLIC_CA2                                                           | 107     | -0.398          | -1.860 | 0.00004 | 0.0084   | 1561 |
| 12 | HALLMARK_FATTY_ACID_METABOLISM                                                                                 | 134     | -0.383          | -1.855 | 0.00004 | 0.0084   | 2795 |
| 13 | REACTOME_MITOCHONDRIAL_FATTY_ACID_BETA_OXIDATION                                                               | 32      | -0.506          | -1.841 | 0.00170 | 0.0730   | 2539 |
| 14 | REACTOME_METABOLISM_OF_NUCLEOTIDES                                                                             | 92      | -0.396          | -1.803 | 0.00030 | 0.0270   | 3165 |
| 15 | REACTOME_NONSENSE_MEDIATED_DECAY_NMD                                                                           | 107     | -0.364          | -1.699 | 0.00043 | 0.0327   | 5086 |

**Top 15 upregulated canonical pathways (C2) in LC patients.**

|    | ID                                                                   | setSize | enrichmentScore | NES   | pvalue  | p.adjust | rank |
|----|----------------------------------------------------------------------|---------|-----------------|-------|---------|----------|------|
| 1  | HALLMARK_INTERFERON_ALPHA_RESPONSE                                   | 96      | 0.605           | 2.462 | 0.00001 | 0.0084   | 4558 |
| 2  | HALLMARK_INTERFERON_GAMMA_RESPONSE                                   | 193     | 0.508           | 2.272 | 0.00001 | 0.0084   | 2436 |
| 3  | REACTOME_RIP_MEDIATED_NFKB_ACTIVATION_VIA_ZBP1                       | 16      | 0.790           | 2.190 | 0.00003 | 0.0084   | 2018 |
| 4  | REACTOME_ZBP1_DAI_MEDIATED_INDUCION_OF_TYPE_I_IFNS                   | 20      | 0.706           | 2.077 | 0.00005 | 0.0086   | 2018 |
| 5  | REACTOME_RORA_ACTIVATES_GENE_EXPRESSION                              | 17      | 0.679           | 1.914 | 0.00064 | 0.0422   | 4065 |
| 6  | REACTOME_INTERFERON_ALPHA_BETA_SIGNALING                             | 56      | 0.512           | 1.896 | 0.00006 | 0.0098   | 4546 |
| 7  | REACTOME_TRANSPORT_OF_MATURE_TRANSCRIPT_TO_CYTOPLASM                 | 79      | 0.474           | 1.869 | 0.00007 | 0.0102   | 4525 |
| 8  | REACTOME_EXPORT_OF_VIRAL_RIBONUCLEOPROTEINS_FROM_NUCLEUS             | 33      | 0.559           | 1.856 | 0.00095 | 0.0535   | 4327 |
| 9  | PID_CD40_PATHWAY                                                     | 28      | 0.572           | 1.827 | 0.00147 | 0.0701   | 3475 |
| 10 | REACTOME_DDX58_IFIH1_MEDIATED_INDUCION_OF_INTERFERON_ALPHA_BETA      | 60      | 0.481           | 1.803 | 0.00042 | 0.0327   | 3551 |
| 11 | REACTOME_NS1_MEDIATED_EFFECTS_ON_HOST_PATHWAYS                       | 40      | 0.516           | 1.785 | 0.00174 | 0.0734   | 4327 |
| 12 | REACTOME_INTERFERON_SIGNALING                                        | 178     | 0.402           | 1.780 | 0.00006 | 0.0099   | 4546 |
| 13 | REACTOME_METABOLISM_OF_FAT_SOLUBLE_VITAMINS                          | 35      | 0.529           | 1.779 | 0.00209 | 0.0795   | 1751 |
| 14 | REACTOME_SUMOYLATION_OF_UBIQUITINYLATION_PROTEINS                    | 39      | 0.516           | 1.776 | 0.00201 | 0.0795   | 5421 |
| 15 | REACTOME_REGULATION_OF_GLUKOKINASE_BY_GLUKOKINASE_REGULATORY_PROTEIN | 31      | 0.542           | 1.773 | 0.00247 | 0.0884   | 4327 |

**Top 15 downregulated ontology gene sets (C5) in LC patients.**

| ID |                                             | setSize | enrichmentScore | NES    | pvalue | p.adjust | rank |
|----|---------------------------------------------|---------|-----------------|--------|--------|----------|------|
| 1  | GOBP_GLUCCOSE_6_PHOSPHATE_METABOLIC_PROCESS | 22      | -0.662          | -2.186 | 0.000  | 0.0245   | 3079 |
| 2  | GOBP_RESPONSE_TO_OXYGEN_RADICAL             | 23      | -0.639          | -2.139 | 0.000  | 0.0245   | 1183 |
| 3  | GOBP_CYTOPLASMIC_TRANSLATION                | 136     | -0.439          | -2.130 | 0.000  | 0.0234   | 5086 |
| 4  | GOCC_INTRACILIARY_TRANSPORT_PARTICLE_B      | 18      | -0.666          | -2.086 | 0.000  | 0.0648   | 4341 |
| 5  | GOCC_CYTOSOLIC_RIBOSOME                     | 93      | -0.456          | -2.077 | 0.000  | 0.0234   | 5086 |
| 6  | GOCC_T_CELL_RECEPTOR_COMPLEX                | 94      | -0.449          | -2.047 | 0.000  | 0.0234   | 4450 |
| 7  | GOBP_PLATELET_AGGREGATION                   | 61      | -0.472          | -1.983 | 0.000  | 0.0245   | 2724 |
| 8  | GOCC_PLATELET_ALPHA_GRANULE_LUMEN           | 50      | -0.491          | -1.980 | 0.000  | 0.0379   | 1314 |
| 9  | GOBP_CELLULAR_AMINO_ACID_CATABOLIC_PROCESS  | 94      | -0.432          | -1.971 | 0.000  | 0.0234   | 2871 |
| 10 | GOBP_PLATELET_ACTIVATION                    | 110     | -0.415          | -1.948 | 0.000  | 0.0234   | 2724 |
| 11 | GOCC_CYTOSOLIC_SMALL_RIBOSOMAL_SUBUNIT      | 40      | -0.506          | -1.941 | 0.001  | 0.0835   | 5085 |
| 12 | GOCC_PLATELET_ALPHA_GRANULE                 | 70      | -0.446          | -1.927 | 0.000  | 0.0245   | 1314 |
| 13 | GOBP_ALPHA_AMINO_ACID_CATABOLIC_PROCESS     | 78      | -0.426          | -1.880 | 0.000  | 0.0355   | 2871 |
| 14 | GOCC_MICROBODY_LUMEN                        | 45      | -0.476          | -1.876 | 0.001  | 0.0835   | 4408 |
| 15 | GOBP_HEMOSTASIS                             | 193     | -0.353          | -1.799 | 0.000  | 0.0239   | 2724 |

**Top 15 upregulated ontology gene sets (C5) in LC patients.**

| ID |                                                      | setSize | enrichmentScore | NES   | pvalue | p.adjust | rank |
|----|------------------------------------------------------|---------|-----------------|-------|--------|----------|------|
| 1  | GOMF_HELICASE_ACTIVITY                               | 149     | 0.463           | 2.006 | 0.000  | 0.0234   | 3554 |
| 2  | GOBP_REGULATION_OF_VIRAL_GENOME_REPLICATION          | 81      | 0.499           | 1.975 | 0.000  | 0.0234   | 2353 |
| 3  | GOBP_NEGATIVE_REGULATION_OF_VIRAL_GENOME_REPLICATION | 53      | 0.535           | 1.959 | 0.000  | 0.0245   | 2353 |
| 4  | GOBP_REGULATION_OF_RIG_I_SIGNALING_PATHWAY           | 19      | 0.664           | 1.928 | 0.001  | 0.0835   | 2291 |
| 5  | GOMF_DNA_HELICASE_ACTIVITY                           | 69      | 0.500           | 1.922 | 0.000  | 0.0234   | 2278 |
| 6  | GOMF_ATP_DEPENDENT_ACTIVITY_ACTING_ON_RNA            | 75      | 0.490           | 1.910 | 0.000  | 0.0234   | 3554 |
| 7  | GOBP_DEFENSE_RESPONSE_TO_SYMBIONT                    | 246     | 0.405           | 1.858 | 0.000  | 0.0234   | 2602 |
| 8  | GOCC_NUCLEAR_PORE                                    | 85      | 0.453           | 1.804 | 0.000  | 0.0427   | 4390 |
| 9  | GOBP_DNA_GEOMETRIC_CHANGE                            | 90      | 0.439           | 1.764 | 0.000  | 0.0598   | 2278 |
| 10 | GOBP_RESPONSE_TO_VIRUS                               | 330     | 0.366           | 1.725 | 0.000  | 0.0234   | 2606 |
| 11 | GOBP_NUCLEAR_EXPORT                                  | 146     | 0.394           | 1.703 | 0.000  | 0.0450   | 3510 |
| 12 | GOBP_HISTONE_METHYLATION                             | 144     | 0.391           | 1.686 | 0.000  | 0.0652   | 3981 |
| 13 | GOBP_MRNA_TRANSPORT                                  | 115     | 0.402           | 1.677 | 0.001  | 0.0985   | 4648 |
| 14 | GOBP_PROTEIN_LOCALIZATION_TO_NUCLEUS                 | 278     | 0.343           | 1.595 | 0.000  | 0.0257   | 6184 |
| 15 | GOMF_HISTONE_BINDING                                 | 209     | 0.352           | 1.587 | 0.000  | 0.0756   | 3489 |

**Supplementary Table 3. Per-figure summary of applied statistical tests.**

| Figure          |                                  | Mean (normal distribution) / Median (non-normal distribution)          | SD (normal distribution) / IQR (non-normal distribution)     | Data transformation (nominal or log10 transformed) | Statistical test applied                                                                                                                          | p-value  | adjusted p-value             | n-numbers HC | LC  |
|-----------------|----------------------------------|------------------------------------------------------------------------|--------------------------------------------------------------|----------------------------------------------------|---------------------------------------------------------------------------------------------------------------------------------------------------|----------|------------------------------|--------------|-----|
| <b>Figure 1</b> |                                  |                                                                        |                                                              |                                                    |                                                                                                                                                   |          |                              |              |     |
| <b>1a</b>       | % Tregs FACS                     |                                                                        |                                                              | N/A                                                | N/A                                                                                                                                               | N/A      |                              | N/A          | N/A |
| <b>1b</b>       | % Tregs                          | Mean: HC 6.63%; LC 4.97%                                               | SD: HC 1.18; LC 1.97                                         | nominal                                            | Unpaired t-test                                                                                                                                   | 0.0137   |                              | 13           | 15  |
| <b>1c</b>       | % Annexin                        | Median: HC 0.39%; LC 8.53%                                             | iQR: HC 2.94; LC 8.92                                        | log10 transformed                                  | unpaired t-test                                                                                                                                   | 0.0106   |                              | 8            | 7   |
| <b>1d</b>       | Phenotype                        |                                                                        |                                                              | log10 transformed                                  | multiple unpaired t-tests and Bonferroni adjustment                                                                                               |          |                              |              |     |
|                 | FoxP3                            | Median: HC 92%; LC 88.2%                                               | IQR: HC 3.65; LC 12.5                                        |                                                    |                                                                                                                                                   | 0.34     | >0.99                        | 17           | 15  |
|                 | CD161                            | Median: HC 4.81; LC 14.8%                                              | IQR: HC 3.44; LC 11.3                                        |                                                    |                                                                                                                                                   | 0.000006 | 0.00006                      | 10           | 10  |
|                 | CD62L CD27                       | Median: HC 79.75%; LC 71.45%                                           | IQR: HC 11.13; LC 18.48                                      |                                                    |                                                                                                                                                   | 0.0056   | 0.056                        | 10           | 10  |
|                 | CD62L                            | Median: HC 89.65%; LC 86.9%                                            | IQR: HC 5.65; LC 8.58                                        |                                                    |                                                                                                                                                   | 0.122    | >0.99                        | 10           | 10  |
|                 | CD27                             | Median: HC 85.55%; LC 75.8%                                            | IQR: HC 17.63; LC 14.9                                       |                                                    |                                                                                                                                                   | 0.053    | 0.53                         | 10           | 10  |
|                 | CXCR3                            | Median: HC 82.85%; LC 82.5%                                            | IQR: HC 5.3; LC 17                                           |                                                    |                                                                                                                                                   | 0.55     | >0.999                       | 10           | 10  |
|                 | CD39                             | Median: HC 42.6%; LC 27%                                               | IQR: HC 40.8; LC 47.1                                        |                                                    |                                                                                                                                                   | 0.062    | 0.62                         | 17           | 19  |
|                 | CTLA-4                           | Median: HC 21.6%; LC 10.7%                                             | IQR: HC 10.43; LC 7.85                                       |                                                    |                                                                                                                                                   | 0.00097  | 0.0097                       | 14           | 11  |
|                 | Helios                           | Median: HC 64.3%; LC 46.3%                                             | IQR: HC 23.2; LC 17.8                                        |                                                    |                                                                                                                                                   | 0.00022  | 0.0022                       | 17           | 19  |
|                 | HLA-DR                           | Median: HC 36.2%; LC 29.2%                                             | IQR: HC 35; LC 29.35                                         |                                                    |                                                                                                                                                   | 0.39     | >0.99                        | 10           | 10  |
| <b>1e</b>       | IL17+ cells after cytokine mixes | Median: Mix 1. HC 1.55%; LC 5.39%<br>Median: Mix 2. HC 0.99%, LC 3.78% | IQR: Mix 1. HC 1.72; LC 5.36<br>IQR: Mix 2. HC 2.53, LC 2.97 | log10 transformed                                  | Two-way repeated measures ANOVA with Bonferroni's multiple comparison test<br>interaction p-value ANOVA (patient group HC/LC vs. Mixes)           | 0.71     | 0.0055<br>0.0015             | 10           | 10  |
|                 | IFNg+ cells after cytokine mixes | Median: Mix 1. HC 3.7%; LC 6.015%<br>Median: Mix 2. HC 4.78%, LC 4.64% | IQR: Mix 1. HC 1.97; LC 4.79<br>IQR: Mix 2. HC 3.72, LC 4.42 | log10 transformed                                  | Two-way repeated measures ANOVA with Bonferroni's multiple comparison test<br>interaction p-value ANOVA (patient group HC/LC vs. Mixes)           | 0.083    | 0.044<br>>0.99               | 10           | 10  |
| <b>1f</b>       | Suppression                      |                                                                        |                                                              | nominal                                            | Two-way repeated measures ANOVA with Bonferroni's multiple comparison test<br>interaction p-value ANOVA (patient group HC/LC vs. Treg:Teff ratio) | <0.0001  | <0.0001<br><0.0001<br>0.0003 | 20           | 20  |
|                 | 1:1                              | Mean: HC 20.17%; LC 71.29%                                             | SD: HC 14.32; LC 10.54                                       |                                                    | 1:1                                                                                                                                               |          |                              |              |     |
|                 | 1:5                              | Mean: HC 13.51; LC 40.59%                                              | SD: HC 17.46; LC 15.45                                       |                                                    | 1:5                                                                                                                                               |          |                              |              |     |
|                 | 1:10                             | Mean: HC 10.33%; LC 31.05%                                             | SD: HC 14.24; LC 15.96                                       |                                                    | 1:10                                                                                                                                              |          |                              |              |     |
| <b>1g</b>       | Suppression ACR vs. NASH         |                                                                        |                                                              | log10 transformed                                  | Two-way repeated measures ANOVA with Bonferroni's multiple comparison test<br>interaction p-value ANOVA (disease aetiology vs. Treg:Teff ratio)   | 0.7476   | 0.3397<br>>0.99<br>>0.99     | 5            | 5   |
|                 | 1:1                              | Mean: HC 27.68%; LC 14.75%<br>Median: HC 30.44% ; LC 11.89%            | SD: HCC 12.72; LC 5.73;<br>IQR: HC 27.44; LC 10.66           |                                                    | 1:1                                                                                                                                               |          |                              |              |     |
|                 | 1:5                              | Mean: HC 4.07%; LC 6.31%<br>Median: HC 4.33%; LC 4.37%                 | SD: HC 3.29; LC 5.62;<br>IQR: HC 7.32; LC 9.41               |                                                    | 1:5                                                                                                                                               |          |                              |              |     |
|                 | 1:10                             | Mean: HC 1.07%; LC 1.82%<br>Median: HC 0%; LC 2.68%                    | SD: HC 1.36; LC 3.04;<br>IQR: HC 2.68; LC 4.56               |                                                    | 1:10                                                                                                                                              |          |                              |              |     |
| <b>1h</b>       | Correlation MELD vs. Supp        |                                                                        |                                                              |                                                    | Simple linear regression<br>Pearson correlation coefficient r=-0.821                                                                              |          |                              |              | 20  |
| <b>1i</b>       | TSDR                             |                                                                        |                                                              | N/A                                                | N/A                                                                                                                                               | N/A      |                              |              |     |
|                 | CpG 44                           | Mean: Teff 94.98%; HC 32.4%; LC 30.85%                                 | SD: Teff 2.051; HC 21.49; LC 37.9                            |                                                    |                                                                                                                                                   |          |                              |              |     |
|                 | CpG 43                           | Mean: Teff 93%; HC 32.23%; LC 29.55%                                   | SD: Teff 1.46; HC 20.9; LC 34.74                             |                                                    |                                                                                                                                                   |          |                              |              |     |
|                 | CpG 42                           | Mean: Teff 93.64%; HC 38.11%; LC 31.82%                                | SD: Teff 0.83; HC 25.57; LC 37.46                            |                                                    |                                                                                                                                                   |          |                              |              |     |
|                 | CpG 41                           | Mean: Teff 95.58%; HC 40.24%; LC 32.17%                                | SD: Teff 0.55; HC 26.77; LC 38.32                            |                                                    |                                                                                                                                                   |          |                              |              |     |

|                     |                                                                    |                                                                                                                                                                                                                                                                                                    |                                                                                                                                                                                                                                                                 |                   |                                                                                                                                                                                            |                                    |                            |                        |
|---------------------|--------------------------------------------------------------------|----------------------------------------------------------------------------------------------------------------------------------------------------------------------------------------------------------------------------------------------------------------------------------------------------|-----------------------------------------------------------------------------------------------------------------------------------------------------------------------------------------------------------------------------------------------------------------|-------------------|--------------------------------------------------------------------------------------------------------------------------------------------------------------------------------------------|------------------------------------|----------------------------|------------------------|
|                     | CpG 40<br>CpG 39<br>CpG 38<br>CpG 37<br>CpG 36<br>CpG 35<br>CpG 34 | Mean: Teff 96.5%; HC 41%; LC 32.15%<br>Mean: Teff 97.02%; HC 40.43%; LC 33.22%<br>Mean: Teff 96.3%; HC 40.47%; LC 32.32%<br>Mean: Teff 97.1%; HC 39.96%; LC 33.17%<br>Mean: Teff 95.58%; HC 38.96%; LC 30.88%<br>Mean: Teff 96.38%; HC 41.64%; LC 33.48%<br>Mean: Teff 96.44%; HC 35.4%; LC 29.35% | SD: Teff 0.62; HC 25.79, LC 38.56<br>SD: Teff 0.95; HC 25.38; LC 38.97<br>SD: Teff 0.19; HC 26.44; LC 38.22<br>SD: Teff 0.75; HC 24.92; LC 38.54<br>SD: Teff 1.71; HC 25.27; LC 37.59<br>SD: Teff 0.28; HC 26.63; LC 39.15<br>SD: Teff 1.16; HC 24.04; LC 36.50 |                   |                                                                                                                                                                                            |                                    |                            |                        |
| <b>Figure 2</b>     |                                                                    |                                                                                                                                                                                                                                                                                                    |                                                                                                                                                                                                                                                                 |                   |                                                                                                                                                                                            |                                    |                            |                        |
| <b>2a</b>           | MFI ROS                                                            | Median: HC 552.3; LC 1363                                                                                                                                                                                                                                                                          | IQR: HC 369.9; LC 5781                                                                                                                                                                                                                                          | log10 transformed | unpaired t-test with Welch's correction                                                                                                                                                    | 0.009                              |                            | 8 7                    |
| <b>2b</b>           | MFI Lipid Peroxidation                                             | Median: HC 398.8; LC 790                                                                                                                                                                                                                                                                           | IQR: HC 324.4; LC 6244                                                                                                                                                                                                                                          | log10 transformed | unpaired t-test with Welch's correction                                                                                                                                                    | 0.0134                             |                            | 8 7                    |
| <b>2c</b>           | MFI Free Thiols                                                    | Median: HC 2034; LC 910                                                                                                                                                                                                                                                                            | IQR: HC 2641.5; LC 839                                                                                                                                                                                                                                          | log10 transformed | unpaired t-test                                                                                                                                                                            | 0.1484                             |                            | 8 7                    |
| <b>2d</b>           | Colocalisation Nox2 subunits                                       | Median: HC 0; LC 0.640                                                                                                                                                                                                                                                                             | IQR: HC 0.1045; LC 0.7910                                                                                                                                                                                                                                       | nominal           | Mann-Whitney test                                                                                                                                                                          | 0.0492                             |                            | 5 7                    |
| <b>2e</b>           | MFI MitoSox                                                        | Median: HC 29.35; LC 52.55                                                                                                                                                                                                                                                                         | IQR: HC 13.92; LC 25.6                                                                                                                                                                                                                                          | log10 transformed | unpaired t-test                                                                                                                                                                            | <0.0001                            |                            | 12 16                  |
| <b>2f</b>           | Seahorse                                                           |                                                                                                                                                                                                                                                                                                    |                                                                                                                                                                                                                                                                 |                   |                                                                                                                                                                                            |                                    |                            | 9 6                    |
| <b>2g</b>           | Basal OCR                                                          | Median: HC 95.56; LC 44.34                                                                                                                                                                                                                                                                         | IQR: HC 116.53; LC 39.85                                                                                                                                                                                                                                        | log10 transformed | unpaired t-test                                                                                                                                                                            | 0.0281                             |                            | 9 6                    |
|                     | Max. OCR                                                           | Median: HC 329.1; LC 144.3                                                                                                                                                                                                                                                                         | IQR: HC 467.7; LC 172.12                                                                                                                                                                                                                                        | log10 transformed | unpaired t-test                                                                                                                                                                            | 0.0576                             |                            | 9 6                    |
|                     | ATP Production                                                     | Median: HC 75.39; LC 21.77                                                                                                                                                                                                                                                                         | IQR: HC 115.04; LC 10.98                                                                                                                                                                                                                                        | log10 transformed | unpaired t-test                                                                                                                                                                            | 0.0008                             |                            | 9 6                    |
|                     | Basal ECAR                                                         | Median: HC 68.71; LC 91.24                                                                                                                                                                                                                                                                         | IQR: HC 33.91; LC 50.43                                                                                                                                                                                                                                         | log10 transformed | unpaired t-test                                                                                                                                                                            | 0.1225                             |                            | 9 6                    |
|                     | Max. ECAR                                                          | Median: HC 17.99; LC 5.11                                                                                                                                                                                                                                                                          | IQR: HC 27.42; LC 4.34                                                                                                                                                                                                                                          | log10 transformed | unpaired t-test                                                                                                                                                                            | 0.025                              |                            | 9 6                    |
|                     | OCR/ECAR                                                           | Median: HC 1.93; LC 0.6108                                                                                                                                                                                                                                                                         | IQR: HC 1.54; LC 0.2                                                                                                                                                                                                                                            | log10 transformed | unpaired t-test                                                                                                                                                                            | 0.0018                             |                            | 9 6                    |
| <b>2h</b>           | EM Mitochondria                                                    |                                                                                                                                                                                                                                                                                                    |                                                                                                                                                                                                                                                                 | log10 transformed | linear mixed effect model                                                                                                                                                                  | 0.026                              |                            | 3 3                    |
| <b>2i / 2j / 2k</b> | RNA Seq                                                            |                                                                                                                                                                                                                                                                                                    |                                                                                                                                                                                                                                                                 | N/A               | N/A                                                                                                                                                                                        |                                    |                            |                        |
| <b>Figure 3</b>     |                                                                    |                                                                                                                                                                                                                                                                                                    |                                                                                                                                                                                                                                                                 |                   |                                                                                                                                                                                            |                                    |                            |                        |
| <b>3a</b>           | Nrf2WB                                                             | Mean: HC 0.58; LC 0.54                                                                                                                                                                                                                                                                             | SD: HC 0.101; LC 0.14                                                                                                                                                                                                                                           | nominal           | unpaired t-test                                                                                                                                                                            | 0.5938                             |                            | 6 5                    |
| <b>3b</b>           | Nrf2 nuclear translocation                                         | -PGJ2 Mean: HC 0.5; LC 0.76<br>+PGJ2 Mean: HC 0.91; LC 0.73                                                                                                                                                                                                                                        | SD: HC 0.13; LC 0.14<br>SD: HC 0.29; LC 0.10                                                                                                                                                                                                                    | nominal           | Two-way repeated measures ANOVA with Bonferroni's multiple comparison test<br>interaction p-value ANOVA (patient group HC/LC vs. PGJ2)<br>-/+ PGJ2: HC<br>-/+ PGJ2: LC<br>HC vs LC (-PGJ2) | 0.0027<br>0.0009<br>>0.99<br>0.083 |                            | 5 5                    |
| <b>3c</b>           | HO-1 WB                                                            | Median: HC 0.11; LC 0.0043                                                                                                                                                                                                                                                                         | IQR: HC 0.16; LC 0.015                                                                                                                                                                                                                                          | log10 transformed | unpaired t-test                                                                                                                                                                            | 0.0198                             |                            | 6 5                    |
| <b>3d</b>           | Bach1 WB                                                           | Median: HC 0.66; LC 0.52                                                                                                                                                                                                                                                                           | IQR: HC 0.78; LC 0.51                                                                                                                                                                                                                                           | log10 transformed | unpaired t-test                                                                                                                                                                            | 0.714                              |                            | 7 5                    |
| <b>3e</b>           | Nrf2 targets                                                       |                                                                                                                                                                                                                                                                                                    |                                                                                                                                                                                                                                                                 | log10 transformed | multiple unpaired t-tests with Bonferroni adjustment                                                                                                                                       |                                    |                            | 15 12                  |
|                     | NQO1                                                               | Median: HC 1.57; LC 1.05                                                                                                                                                                                                                                                                           | IQR: HC 0.33; LC 0.7                                                                                                                                                                                                                                            |                   |                                                                                                                                                                                            | 0.000393                           | 0.001179                   |                        |
|                     | GCLM                                                               | Median: HC 1.37; LC 0.40                                                                                                                                                                                                                                                                           | IQR: HC 1.41; LC 0.76                                                                                                                                                                                                                                           |                   |                                                                                                                                                                                            | 0.000949                           | 0.002848                   |                        |
| <b>3f</b>           | SOD1                                                               | Median: HC 0.75; LC 0.82                                                                                                                                                                                                                                                                           | IQR: HC 0.29; LC 0.42                                                                                                                                                                                                                                           |                   |                                                                                                                                                                                            | 0.332385                           | 0.997155                   |                        |
| <b>3g</b>           | RNA Seq                                                            |                                                                                                                                                                                                                                                                                                    |                                                                                                                                                                                                                                                                 | N/A               | N/A                                                                                                                                                                                        |                                    |                            |                        |
|                     | Nrf2KO MFI FoxP3                                                   | Mean: HC 4520; LC 2955                                                                                                                                                                                                                                                                             | SD: HC 297.8; LC 176.8                                                                                                                                                                                                                                          | nominal           | multiple unpaired t-tests with Bonferroni adjustment                                                                                                                                       | 0.0014                             | 0.0042                     | 3 3                    |
|                     | Nrf2KO MFI CD39                                                    | Mean: HC 1247; LC 908.3                                                                                                                                                                                                                                                                            | SD: HC 128.5; LC 27.02                                                                                                                                                                                                                                          | nominal           | multiple unpaired t-tests with Bonferroni adjustment                                                                                                                                       | 0.0111                             | 0.0333                     | 3 3                    |
| <b>3h</b>           | Nrf2KO MFI CTLA4                                                   | Mean: HC 972; LC 794.3                                                                                                                                                                                                                                                                             | SD: HC 55.57; LC 45.94                                                                                                                                                                                                                                          | nominal           | multiple unpaired t-tests with Bonferroni adjustment                                                                                                                                       | 0.013                              | 0.039                      | 3 3                    |
| <b>3i</b>           | Nrf2KO Annexin                                                     | Mean: HC 10.20%; LC 14.65%                                                                                                                                                                                                                                                                         | SD: HC 1.73; LC 0.69                                                                                                                                                                                                                                            | nominal           | unpaired t-test                                                                                                                                                                            | 0.0007                             |                            | 5 5                    |
|                     | Nrf2KO Suppression                                                 | 1:1 'Mean: HC 45.14%; LC 18.57%<br>1:2 'Mean: HC 25.57%; LC 14.86%                                                                                                                                                                                                                                 | SD: HC 4.22; LC 4.28<br>SD: HC 3.69; LC 3.58                                                                                                                                                                                                                    | nominal           | Two-way repeated measures ANOVA with Bonferroni's multiple comparison<br>interaction p-value ANOVA (Treg Teff ratio vs. patient group HC/LC)                                               | <0.0001<br><0.0001<br><0.0001      |                            | 7 7                    |
| <b>3j</b>           | CRISPR KO efficiency                                               | Median: WT 22.05%, NC 15.6%, KO 76.1%                                                                                                                                                                                                                                                              | IQR: WT 15.2, NC 29.2, KO 21.35                                                                                                                                                                                                                                 | log10 transformed | ordinary one-way ANOVA with Bonferroni's multiple comparison test<br>WT vs. NC<br>WT vs. KO<br>NC vs. KO                                                                                   |                                    | >0.99<br>0.0001<br><0.0001 | WT 10, NC 11,<br>KO 12 |
| <b>3k</b>           | CRISPR suppression                                                 | 1:1 Mean: WT 96.42%, NC 96.57%, KO 96.76 %                                                                                                                                                                                                                                                         | SD: WT 4.52, NC 4.35, KO 3.04                                                                                                                                                                                                                                   | nominal           | Linear mixed effect model with Bonferroni's multiple comparison test<br>interaction p-value ANOVA (genotype vs. Treg Teff ratio)                                                           | 0.7543                             |                            | WT 4, NC 3, KO 4       |



|                     |                                                                                                 |                                                                                                                                                                                                                  |                                                                                                                                                                                |                                                                                                                            |                                                                                                                                                                                                                                                                                                                  |                                                                                                           |                                                             |     |
|---------------------|-------------------------------------------------------------------------------------------------|------------------------------------------------------------------------------------------------------------------------------------------------------------------------------------------------------------------|--------------------------------------------------------------------------------------------------------------------------------------------------------------------------------|----------------------------------------------------------------------------------------------------------------------------|------------------------------------------------------------------------------------------------------------------------------------------------------------------------------------------------------------------------------------------------------------------------------------------------------------------|-----------------------------------------------------------------------------------------------------------|-------------------------------------------------------------|-----|
|                     |                                                                                                 | 1:5 'Mean: WT 90.52%, NC 90.92%, KO 92.15%<br>1:10 'Mean: WT 79.54%, NC 78.74%, KO 86.34%<br>1:20 Mean: WT 45.7%, NC 57.79%, KO 57.05%                                                                           | SD: WT 7.85, NC 7.34, KO 5.71<br>SD: WT 10.06, NC 11.27, KO 5.12<br>SD: WT 0.74, NC 24.06, KO 23.81                                                                            |                                                                                                                            | 1:1 - WT vs. NC<br>1:1 - WT vs. KO<br>1:1 - NC vs. KO<br>1:5 - WT vs. NC<br>1:5 - WT vs. KO<br>1:5 - NC vs. KO<br>1:10 - WT vs. NC<br>1:10 - WT vs. KO<br>1:10 - NC vs. KO<br>1:20 - WT vs. NC<br>1:20 - WT vs. KO<br>1:20 - NC vs. KO                                                                           | >0.99<br>>0.99<br>>0.99<br>>0.99<br>>0.99<br>>0.99<br>>0.99<br>0.8643<br>>0.99<br>>0.99<br>>0.99<br>>0.99 |                                                             |     |
| <b>3i</b>           | CRISPR viability                                                                                | 0uM: 'Mean: WT 58.57%, NC 55.17%, KO 53.7%<br>40uM: 'Mean: WT 56.07%, NC 54.07%, KO 38.17%<br>70uM: 'Mean: WT 52.17%, NC 50.5%, KO 32.27%                                                                        | SD: WT 3.33, NC 1.76, KO 5.72<br>SD: WT 1.35, NC 3.3, KO 9.53<br>SD: WT 1.91, NC 1.7, KO 8.95                                                                                  | nominal                                                                                                                    | Two-way repeated measures ANOVA with Bonferroni's multiple comparison<br>interaction p-value ANOVA (genotype vs. concentration)<br>0uM - WT vs. NC<br>0uM - WT vs. KO<br>0uM - NC vs. KO<br>40uM - WT vs. NC<br>40uM - WT vs. KO<br>40uM - NC vs. KO<br>70uM - WT vs. NC<br>70uM - WT vs. KO<br>70uM - NC vs. KO | 0.054<br>>0.99<br>0.7819<br>>0.99<br>>0.99<br>0.0014<br>0.004<br>>0.99<br>0.0005<br>0.0012                | WT 3, NC 3, KO 3                                            |     |
| <b>Figure 4</b>     |                                                                                                 |                                                                                                                                                                                                                  |                                                                                                                                                                                |                                                                                                                            |                                                                                                                                                                                                                                                                                                                  |                                                                                                           |                                                             |     |
| <b>4a</b>           | Serum: MFI FoxP3                                                                                | Median: HC 836; LC 773                                                                                                                                                                                           | IQR: HC 882.5; LC 870                                                                                                                                                          | log10 transformed                                                                                                          | unpaired t-test                                                                                                                                                                                                                                                                                                  | 0.8959                                                                                                    |                                                             | 5 5 |
| <b>4b</b>           | Serum: AnnexinV                                                                                 | Median: HC 5.41%; LC 14.2%                                                                                                                                                                                       | IQR: HC 4.14; LC 6.83                                                                                                                                                          | log10 transformed                                                                                                          | unpaired t-test                                                                                                                                                                                                                                                                                                  | 0.0151                                                                                                    |                                                             | 7 7 |
| <b>4c</b>           | Serum: IL-17+ / IFNg                                                                            | IL-17: Median: HC 0.51; LC 0.9<br>IFNg: Median: HC 2.0; LC 2.61                                                                                                                                                  | IQR: HC 0.23; LC 0.465<br>IQR: HC 1.1; LC 0.665                                                                                                                                | log10 transformed                                                                                                          | multiple unpaired t-tests with Bonferroni adjustment<br>IL-17<br>IFNg                                                                                                                                                                                                                                            | 0.0123<br>0.1845                                                                                          | 0.0246<br>0.369                                             | 5 5 |
| <b>4d</b>           | Serum: % Suppression                                                                            | 1:1 Mean: HC 37.57%; LC 16.75%<br>1:5 Mean: HC 26.47%; LC 12.45%<br>1:10 Mean: HC 21.11%; LC 10.71%                                                                                                              | SD: HC 8.44; LC 4.74<br>SD: HC 8.43; LC 5.26<br>SD: HC 9.27; LC 5.44                                                                                                           | nominal                                                                                                                    | Two-way repeated measures ANOVA with Bonferroni multiple comparison test<br>interaction p-value ANOVA (Treg Teff ratio vs. patient group HC/LC serum)<br>1:1<br>1:5<br>1:10                                                                                                                                      | <0.0001<br><0.0001<br>0.0027<br>0.0374                                                                    |                                                             | 9 9 |
| <b>4e</b>           | Serum: Seahorse<br>Basal OCR<br>Max OCR<br>ATP Production<br>Basal ECAR<br>Max ECAR<br>OCR/ECAR | Median: HC 60.90; LC 81.53<br>Median: HC 141; LC 162<br>Median: HC 58.91; LC 74.01<br>Median: HC 14.18; LC 22.25<br>Median: HC 15.21; LC 19.14<br>Median: HC 6.45; LC 5.71                                       | IQR: HC 12.67; LC 37.1<br>IQR: HC 96.8; LC 102.1<br>IQR: HC 19.28; LC 19.69<br>IQR: HC 2.67; LC 9.19<br>IQR: HC 4.07; LC 7.36<br>IQR: HC 1.581; LC 1.057                       | log10 transformed<br>log10 transformed<br>log10 transformed<br>log10 transformed<br>log10 transformed<br>log10 transformed | unpaired t-test<br>unpaired t-test<br>unpaired t-test<br>unpaired t-test<br>unpaired t-test<br>unpaired t-test                                                                                                                                                                                                   | 0.0627<br>0.6277<br>0.0752<br>0.0131<br>0.016<br>0.3956                                                   |                                                             | 5 6 |
| <b>Supp. Fig. 1</b> |                                                                                                 |                                                                                                                                                                                                                  |                                                                                                                                                                                |                                                                                                                            |                                                                                                                                                                                                                                                                                                                  |                                                                                                           |                                                             |     |
| <b>S1a</b>          | Gating                                                                                          |                                                                                                                                                                                                                  |                                                                                                                                                                                | N/A                                                                                                                        | N/A                                                                                                                                                                                                                                                                                                              |                                                                                                           |                                                             |     |
| <b>S1b</b>          | %CD3CD4                                                                                         | Mean: HC 45.60%; LC 46.13%                                                                                                                                                                                       | SD: HC 6.49; LC 5.69                                                                                                                                                           | nominal                                                                                                                    | unpaired t-test                                                                                                                                                                                                                                                                                                  | 0.88                                                                                                      |                                                             | 7 6 |
| <b>S1c</b>          | Extended phenotype<br>TIM-3<br>FAS-L<br>Granzyme B<br>PD1<br>PDL-1<br>GITR<br>Galectin-9        | Median: HC 2.79%; LC 4.12%<br>Median: HC 4.34%; LC 7.12%<br>Median: HC 2.14%; LC 2.5%<br>Median: HC 10.5%; LC 10.43%<br>Median: HC 3.1%; LC 5.49%<br>Median: HC 0.395%; LC 0.54%<br>Median: HC 66.15%; LC 70.15% | IQR: HC 1.72; LC 8.89<br>IQR: HC 9.52; LC 11.84<br>IQR: HC 2.56; LC 2.66<br>IQR: HC 4.78; LC 8.76<br>IQR: HC 2.48; LC 1.87<br>IQR: HC 0.785; LC 7.35<br>IQR: HC 10.9; LC 43.12 | log10 transformed                                                                                                          | multiple unpaired t-tests with Bonferroni adjustment                                                                                                                                                                                                                                                             | 0.294<br>0.553<br>0.512<br>0.991<br>0.177<br>0.318<br>0.719                                               | >0.99<br>>0.99<br>>0.99<br>>0.99<br>>0.99<br>>0.99<br>>0.99 | 4 4 |

|                    |                                      |                                                                                                                                       |                                                                           |                   |                                                                                                              |                                                                                             |    |             |
|--------------------|--------------------------------------|---------------------------------------------------------------------------------------------------------------------------------------|---------------------------------------------------------------------------|-------------------|--------------------------------------------------------------------------------------------------------------|---------------------------------------------------------------------------------------------|----|-------------|
|                    | ICOS L<br>ICOS<br>GARP               | Median: HC 0.17%; LC 0.082%<br>Median: HC 31.15%; LC 52.95%<br>Median: HC 6.735%; LC 9.12%                                            | IQR: HC 1.03; LC 0.84<br>IQR: HC 40.08; LC 49.1<br>IQR: HC 7.16; LC 18.20 |                   |                                                                                                              | 0.380 >0.99<br>0.411 >0.99<br>0.277 >0.99                                                   |    |             |
| <b>S1d</b>         | Miyara population                    | Population I: Median: HC 15.8%; LC 10.39%<br>Population II: Median: HC 6.87%; LC 9.43%<br>Population III: Median: HC 57.15%; LC 44.9% | IQR: HC 14.25; LC 16.43<br>IQR: HC 4.19; LC 9.39<br>IQR: HC 16.6; LC 15.9 | log10 transformed | multiple unpaired t-test with Bonferroni adjustment<br>Population I<br>Population II<br>Population III       | 0.63 >0.99<br>0.958 >0.99<br>0.251 0.754                                                    | 10 | 10          |
| <b>S1e</b>         | CD161 within Miyara populations      | Population I: Median: HC 0.62%; LC 3.78%<br>Population II: Median: HC 1.61%; LC 3.94%<br>Population III: Median: HC 3.22%; LC 21%     | IQR: HC 1.051; LC 2.88<br>IQR: HC 3.16; LC 5.11<br>IQR: HC 5.55; LC 19.32 | log10 transformed | multiple unpaired t-test with Bonferroni adjustment<br>Population I<br>Population II<br>Population III       | 0.000245 0.000736<br>0.01998 0.0599<br>0.000425 0.00127                                     | 10 | 10          |
| <b>S1f</b>         | Baseline cytokine expression         | IL-17: Median: HC 0.96 ; LC 1.19<br>IFNg: Median: HC 2.2 ; LC 2.73                                                                    | IQR: HC 0.37 ; LC 0.975<br>IQR: HC 1.84 ; LC 1.98                         | log10 transformed | multiple unpaired t-test with Bonferroni adjustment<br>IL-17+<br>IFNg+                                       | 0.0548 0.1096<br>0.1402 0.2804                                                              | 5  | 5           |
| <b>S1g</b>         | Correlation MELD components vs. Supp |                                                                                                                                       |                                                                           | nominal           | Simple linear regression: Bilirubin<br>Simple linear regression: INR<br>Simple linear regression: Creatinine | pearson coefficient r=0.1513<br>pearson coefficient r=0.1501<br>pearson coefficient r=0.105 |    | 9<br>9<br>9 |
| <b>S1h</b>         | Cytokines in Serum                   |                                                                                                                                       |                                                                           |                   |                                                                                                              |                                                                                             |    |             |
|                    | IL-18                                | Median: HC 33.27; LC 79.95                                                                                                            | IQR: HC 74.1; LC 52.51                                                    | log10 transformed | unpaired t-test with Bonferroni adjustment for multiple comparison                                           | 0.053 >0.99                                                                                 | 5  | 9           |
|                    | IL-1 alpha                           | Median: HC 3.15; LC 5.770                                                                                                             | IQR: HC 2.115; LC 9.54                                                    | log10 transformed | unpaired t-test with Welch's correction with Bonferroni adjustment for multiple comparison                   | 0.0546 >0.99                                                                                | 5  | 9           |
|                    | IL-1 beta                            | Median: HC 3.00; LC 3.43                                                                                                              | IQR: HC 20.85; LC 2.13                                                    | log10 transformed | unpaired t-test with Welch's correction with Bonferroni adjustment for multiple comparison                   | 0.3533 >0.99                                                                                | 5  | 9           |
|                    | IL-6                                 | Median: HC 2.21; LC 3.50                                                                                                              | IQR: HC 2.36; LC 2.775                                                    | log10 transformed | unpaired t-test with Bonferroni adjustment for multiple comparison                                           | 0.1407 >0.99                                                                                | 5  | 10          |
|                    | TNF-alpha                            | Median: HC 3.79; LC 3.425                                                                                                             | IQR: HC 2.845; LC 4.773                                                   | log10 transformed | unpaired t-test with Bonferroni adjustment for multiple comparison                                           | 0.6919 >0.99                                                                                | 5  | 10          |
|                    | IL-17A                               |                                                                                                                                       |                                                                           | N/A               | N/A                                                                                                          |                                                                                             | 5  | 10          |
|                    | IL12p40                              |                                                                                                                                       |                                                                           | N/A               | N/A                                                                                                          |                                                                                             | 5  | 9           |
|                    | IL12p70                              | Median: HC 1.76; LC 1.69                                                                                                              | IQR: HC 2.795; LC 1.91                                                    | log10 transformed | unpaired t-test with Bonferroni adjustment for multiple comparison                                           | 0.6507 >0.99                                                                                | 5  | 9           |
|                    | IL-23                                | Median: HC 10.06; LC 4.77                                                                                                             | IQR: HC 35.93; LC 6.42                                                    | log10 transformed | unpaired t-test with Bonferroni adjustment for multiple comparison                                           | 0.2451 >0.99                                                                                | 5  | 9           |
|                    | IL-27                                | Median: HC 20.96; LC 20.96                                                                                                            | IQR: HC 166.94; LC 81.285                                                 | log10 transformed | unpaired t-test with Bonferroni adjustment for multiple comparison                                           | 0.8651 >0.99                                                                                | 5  | 9           |
|                    | IFN-alpha                            | Median: HC 7.34; LC 5.55                                                                                                              | IQR: HC 18.195; LC 22.72                                                  | log10 transformed | unpaired t-test with Bonferroni adjustment for multiple comparison                                           | 0.803 >0.99                                                                                 | 5  | 9           |
|                    | IL-9                                 | Median: HC 0.65; LC 0                                                                                                                 | IQR: HC 0.67; LC 0.74                                                     | log10 transformed | unpaired t-test with Welch's correction with Bonferroni adjustment for multiple comparison                   | 0.2613 >0.99                                                                                | 5  | 10          |
|                    | IL-11                                | Median: HC 3.81; LC 2.47                                                                                                              | IQR: HC 5.18; LC 3.74                                                     | log10 transformed | unpaired t-test with Bonferroni adjustment for multiple comparison                                           | 0.5041 >0.99                                                                                | 5  | 9           |
|                    | IL-10                                | Median: HC 1.68; LC 2.13                                                                                                              | IQR: HC 1.45; LC 2.913                                                    | log10 transformed | unpaired t-test with Bonferroni adjustment for multiple comparison                                           | 0.1794 >0.99                                                                                | 5  | 10          |
|                    | IL-22                                | Median: HC 21.18; LC 24.05                                                                                                            | IQR: HC 13.64; LC 16.11                                                   | log10 transformed | unpaired t-test with Bonferroni adjustment for multiple comparison                                           | 0.9808 >0.99                                                                                | 5  | 10          |
|                    | IL-15                                | Median: HC 6.65; LC 4.89                                                                                                              | IQR: HC 6.82; LC 2.64                                                     | log10 transformed | unpaired t-test with Bonferroni adjustment for multiple comparison                                           | 0.0591 >0.99                                                                                | 5  | 9           |
|                    | IL-5                                 | Median: HC 1.38; LC 1.060                                                                                                             | IQR: HC 1.835; LC 1.798                                                   | log10 transformed | unpaired t-test with Bonferroni adjustment for multiple comparison                                           | 0.5608 >0.99                                                                                | 5  | 10          |
|                    | GM-CSF                               | Median: HC 2.600; LC 1.990                                                                                                            | IQR: HC 5.1; LC 1.06                                                      | log10 transformed | unpaired t-test with Welch's correction with Bonferroni adjustment for multiple comparison                   | 0.2738 >0.99                                                                                | 5  | 9           |
|                    | IL-13                                |                                                                                                                                       |                                                                           | N/A               | N/A                                                                                                          |                                                                                             | 5  | 10          |
|                    | IL-33                                | Median: HC 8.870; LC 4.610                                                                                                            | IQR: HC 137.3; LC 617.415                                                 | log10 transformed | unpaired t-test with Bonferroni adjustment for multiple comparison                                           | 0.7944 >0.99                                                                                | 5  | 9           |
| <b>Supp. Fig.2</b> |                                      |                                                                                                                                       |                                                                           |                   |                                                                                                              |                                                                                             |    |             |
| <b>S2a</b>         | HO-1 ELISA                           | Median: HC 5.29; LC 2.11                                                                                                              | IQR: HC 1.68; LC 3.136                                                    | log10 transformed | unpaired t-test with Welch's correction                                                                      | 0.0232                                                                                      | 5  | 6           |
| <b>S2b</b>         | Heme                                 | Median: HC 2.69; LC 5.025                                                                                                             | IQR: HC 2.906; LC 6.286                                                   | log10 transformed | unpaired t-test                                                                                              | 0.5737                                                                                      | 3  | 4           |
| <b>Supp. Fig.3</b> | Indels HO-1 KO cells                 |                                                                                                                                       |                                                                           | N/A               | N/A                                                                                                          |                                                                                             |    |             |

**Supplementary Table 4. Summary of fluorochrome-conjugated antibodies.**

| <b>Target</b>         | <b>Antibody clone</b> | <b>Fluorochrome</b> | <b>Company</b>              | <b>Cat. Nr.</b> | <b>RRID tag</b> |
|-----------------------|-----------------------|---------------------|-----------------------------|-----------------|-----------------|
| <b><u>Human:</u></b>  |                       |                     |                             |                 |                 |
| CD3                   | OKT3                  | BV711               | Biologend                   | 317328          | AB_2562907      |
| CD4                   | SK3                   | PercP               | Biologend                   | 344624          | AB_2563326      |
| CD4                   | SK3                   | BUV395              | BD Biosciences              | 563550          | AB_2738273      |
| CD4                   | RPA-T4                | BV605               | Biologend                   | 300556          | AB_2564391      |
| CD8                   | HIT8a                 | Pacific Blue        | Biologend                   | 300928          | AB_10612929     |
| CD25                  | 2A3                   | APC                 | BD Biosciences              | 340907          | AB_2819021      |
| CD25                  | CD25-4E3              | PE                  | Thermo Fisher - eBioscience | 12-0257-42      | AB_2043825      |
| CD25                  | M-A251                | PE                  | BD Biosciences              | 555432          | AB_395826       |
| CD45RA                | JS-83                 | FITC                | Thermo Fisher - eBioscience | 11-9979-42      | AB_11151708     |
| FOXP3                 | PCH101                | FITC                | Thermo Fisher - eBioscience | 11-4776-42      | AB_1724125      |
| FOXP3                 | PCH101                | PE                  | Thermo Fisher - eBioscience | 12-4776-42      | AB_1518782      |
| FOXP3                 | 236A/E7               | PECF594             | BD Biosciences              | 563955          | AB_2738507      |
| CD127                 | eBioRDR5              | eFluor450           | Thermo Fisher - eBioscience | 48-1278-42      | AB_1963566      |
| CD127                 | A019D5                | PECy7               | Biologend                   | 351320          | AB_10897098     |
| CD127                 | A019D5                | BV510               | Biologend                   | 351332          | AB_2562304      |
| CCR6                  | R6H1                  | PECy7               | Thermo Fisher - eBioscience | 25-1969-42      | AB_1257138      |
| CD161                 | HP-3G10               | eFluor450           | Thermo Fisher - eBioscience | 48-1619-42      | AB_10854273     |
| CD27                  | O323                  | eFluor450           | Thermo Fisher - eBioscience | 48-0279-42      | AB_10852844     |
| CD62L                 | DREG-56               | PECy7               | Biologend                   | 304822          | AB_830801       |
| HLA-DR                | LN3                   | PECy7               | Thermo Fisher - eBioscience | 25-9956-42      | AB_1582284      |
| CD39                  | eBioA1                | PECy7               | Thermo Fisher - eBioscience | 25-0399-42      | AB_1582280      |
| CD39                  | A1                    | APC/Cy7             | Biologend                   | 328226          | AB_2571981      |
| ICOS-L                | MIH12                 | PE                  | Thermo Fisher - eBioscience | 12-5889-42      | AB_10853668     |
| CTLA-4                | 14D3                  | PE                  | Thermo Fisher - eBioscience | 12-1529-42      | AB_10805626     |
| CTLA-4                | BN13                  | BV605               | Biologend                   | 369610          | AB_2632779      |
| Granzyme-B            | GB11                  | PE                  | Thermo Fisher - eBioscience | GRB04           | AB_1500188      |
| PD-1                  | eBioJ105              | PE                  | Thermo Fisher - eBioscience | 12-2799-42      | AB_11042478     |
| CD274 (PDL-1)         | MIH-1                 | PECy7               | Thermo Fisher - eBioscience | 25-5983-42      | AB_1907368      |
| GITR                  | eBioAITR              | PE                  | Thermo Fisher - eBioscience | 12-5875-42      | AB_2572634      |
| GARP                  | G14D9                 | eFluor660           | Thermo Fisher - eBioscience | 50-9882-42      | AB_2574406      |
| Helios                | 22F6                  | PE                  | Biologend                   | 137216          | AB_10660749     |
| Helios                | 22F6                  | PE/Cy7              | Biologend                   | 137236          | AB_2565990      |
| CXCR3                 | G025H7                | Pacific Blue        | Biologend                   | 353724          | AB_2561442      |
| CD178 (FAS-L)         | NOK-1                 | PE                  | Biologend                   | 306407          | AB_2100664      |
| TIM-3                 | F38-2E2               | PE                  | Biologend                   | 345006          | AB_2116576      |
| HO-1                  | 23                    | AF647               | BD Biosciences              | 566391          | AB_2739722      |
| IL-17A                | BL168                 | BV605               | Biologend                   | 512326          | AB_2563887      |
| IFNg                  | 4S.B3                 | PE/Cy7              | Biologend                   | 502528          | AB_2123323      |
| <b><u>Murine:</u></b> |                       |                     |                             |                 |                 |
| CD3                   | 145-2C11              | APC                 | Thermo Fisher - eBioscience | 17-0031-82      | AB_469315       |
| CD4                   | GK1.5                 | FITC                | Thermo Fisher - eBioscience | 11-0041-82      | AB_464892       |
| CD8                   | 53-6.7,               | eFluor450           | Thermo Fisher - eBioscience | 48-0081-82      | AB_1272198      |
| CD25                  | PC61.5,               | eFluor780           | Thermo Fisher - eBioscience | 47-0251-82      | AB_1272179      |
| FoxP3                 | FJK-16s,              | PE                  | Thermo Fisher - eBioscience | 12-5773-82      | AB_465936       |
| CTLA-4                | UC10-4B9              | PECy7               | Thermo Fisher - eBioscience | 25-1522-82      | AB_2688105      |
| CD39                  | 24DMS1                | PercP-eFluor710     | Thermo Fisher - eBioscience | 46-0391-82      | AB_10717953     |
