# Supplementary material for: Dysregulated anti-oxidant signalling and compromised mitochondrial integrity negatively influence regulatory T cell function and viability in liver disease
Source: PubMed Central journal article supplement (PMC10480539; doi:10.1016/j.ebiom.2023.104778), 2023-08-30
Supplement: mmc2.pdf [file mmc2.pdf]

# Supplemental Western Blot

## Nrf2

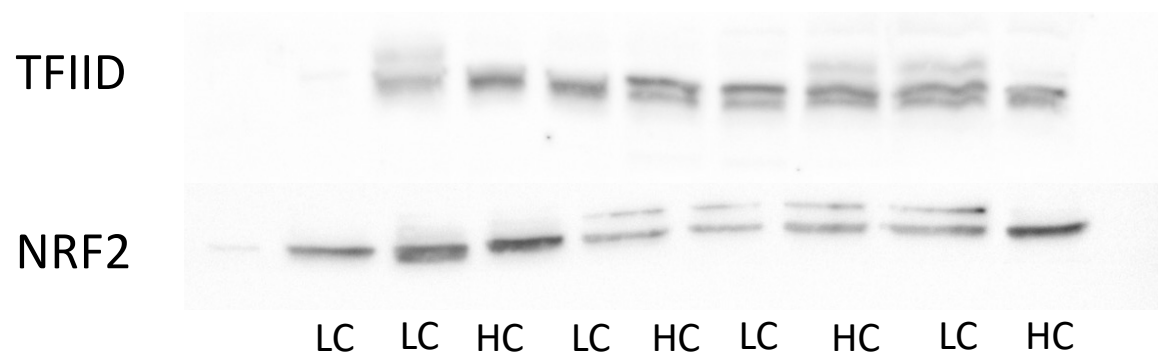

# HO-1

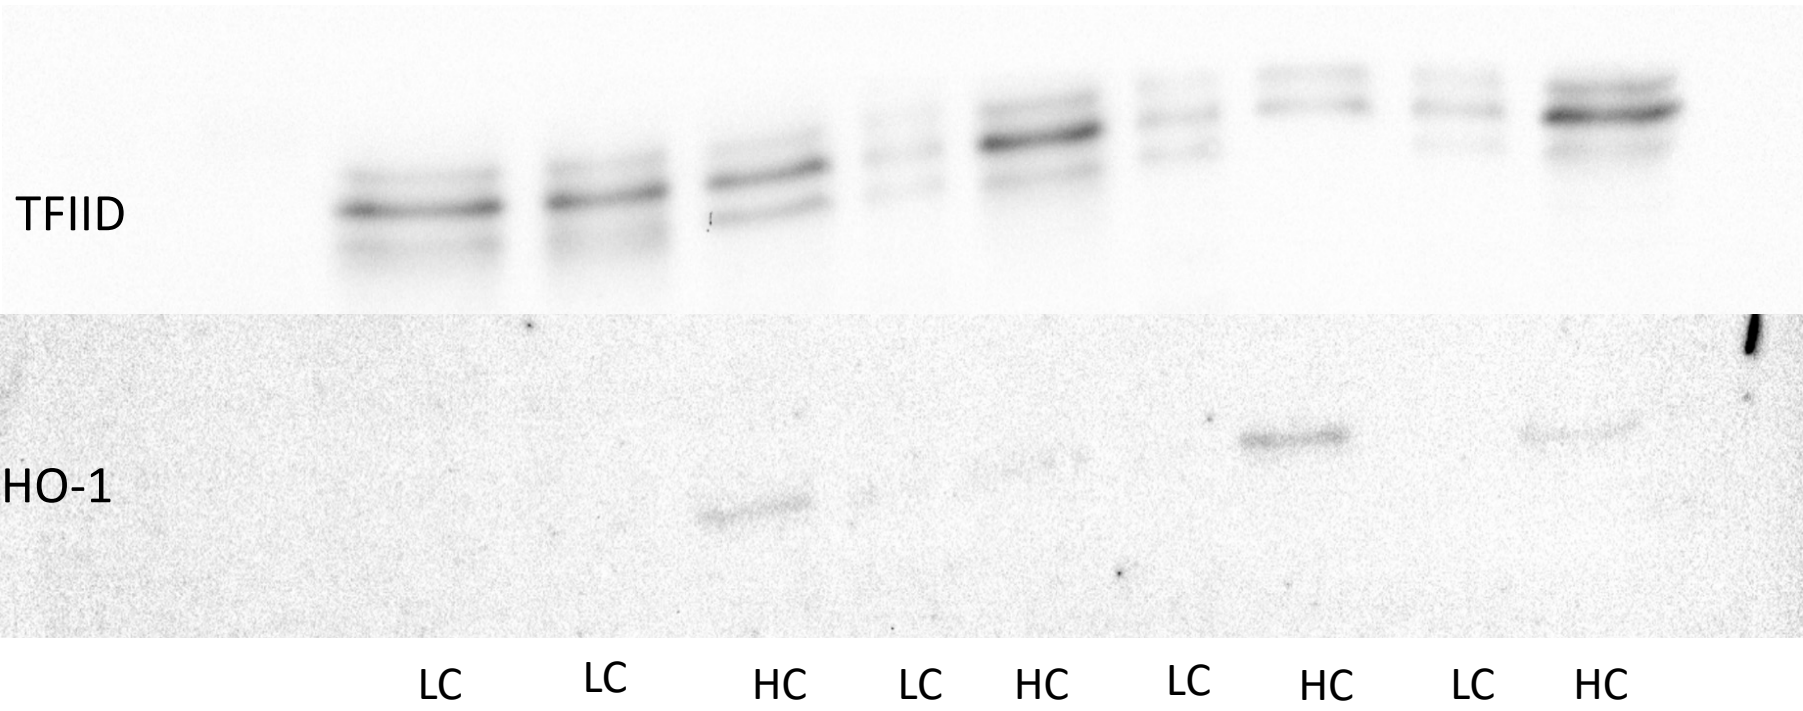



# Nrf2/HO-1/Bach1

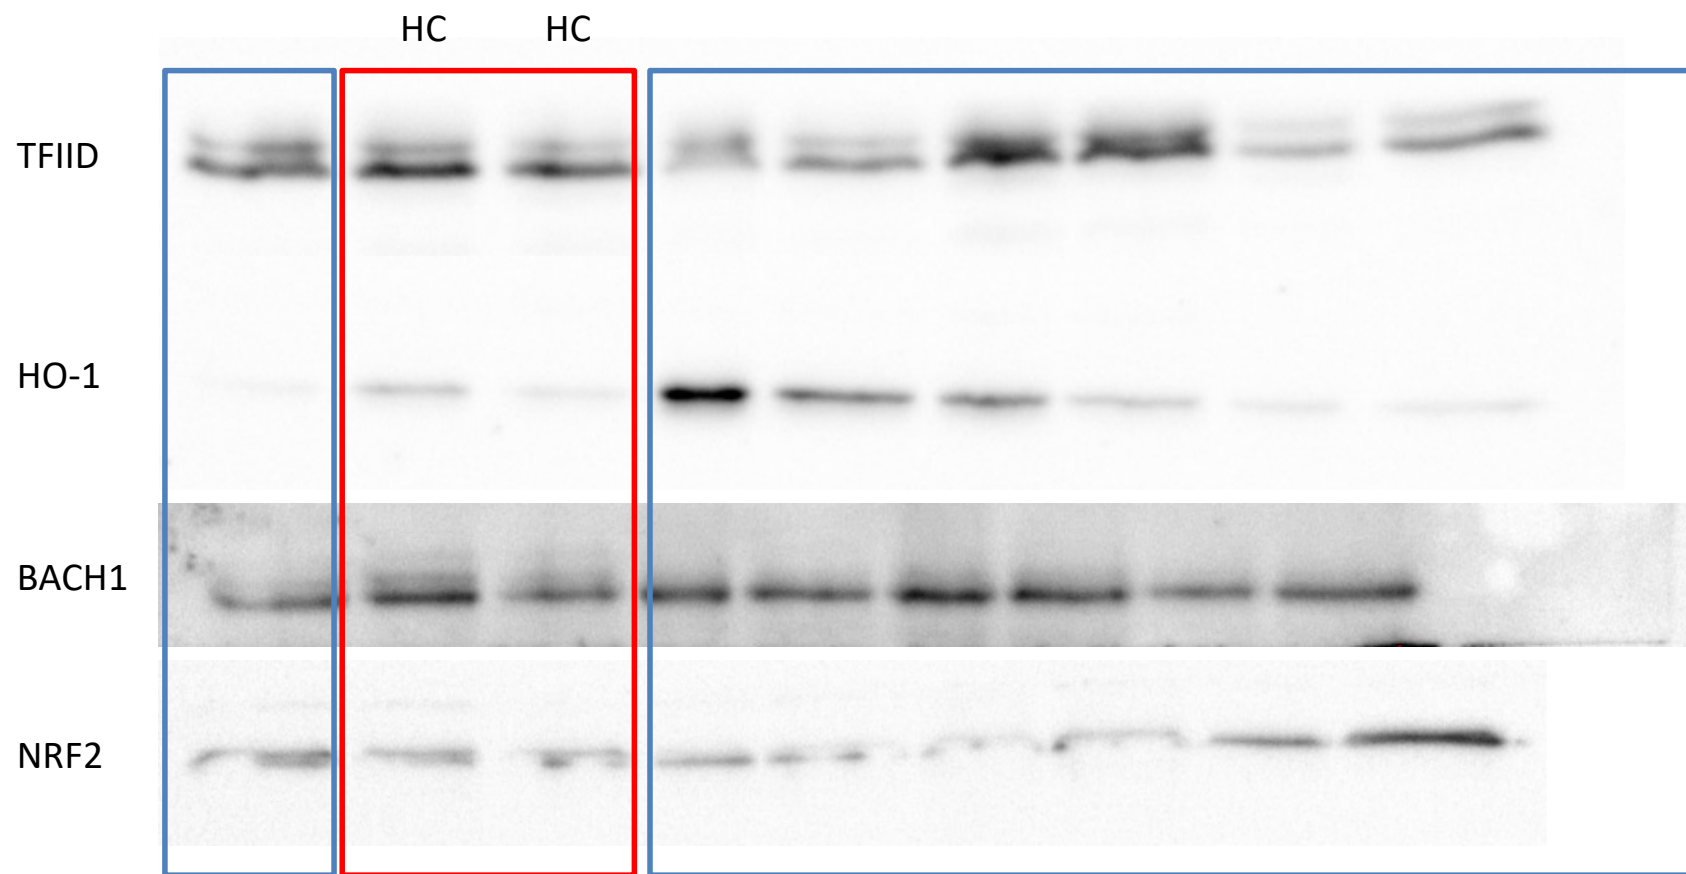

Sample not related to this study

Samples not related to this study
